1 **Title: Micronutrient supplements with iron promote disruptive protozoan and fungal**  
2 **communities in the developing infant gut**

3

4 Ana Popovic<sup>1,2</sup>, Celine Bourdon<sup>3,4</sup>, Pauline W. Wang<sup>5,6</sup>, David S. Guttman<sup>5,6</sup>, Sajid Soofi<sup>7</sup>,  
5 Zulfiqar A. Bhutta<sup>4,7</sup>, Robert H. J. Bandsma<sup>3,4</sup>, John Parkinson<sup>1,2,8,\*</sup> and Lisa G. Pell<sup>4</sup>

6

7 <sup>1</sup>Program in Molecular Medicine, Hospital for Sick Children Research Institute

8 <sup>2</sup>Department of Biochemistry, University of Toronto, Toronto, Ontario, Canada

9 <sup>3</sup>Division of Gastroenterology, Hepatology and Nutrition, Hospital for Sick Children, Toronto,  
10 Ontario, Canada

11 <sup>4</sup>Centre for Global Child Health, Hospital for Sick Children, Toronto, Ontario, Canada

12 <sup>5</sup>Department of Cell & Systems Biology, University of Toronto, Toronto, Ontario, Canada

13 <sup>6</sup>Centre for the Analysis of Genome Evolution & Function, University of Toronto, Toronto,  
14 Ontario, Canada

15 <sup>7</sup>Center of Excellence in Women and Child Health, the Aga Khan University, Karachi, Pakistan

16 <sup>8</sup>Department of Molecular Genetics, University of Toronto, Toronto, Ontario, Canada

17

18 \*To whom correspondence should be addressed:

19 [john.parkinson@utoronto.ca](mailto:john.parkinson@utoronto.ca)

20

21 **Keywords: Eukaryotic microbiota; Parasites; Malnutrition; Micronutrient Supplementation;**  
22 **Microbiome**

23 **Abstract**

24

25 Supplementation with micronutrients, including vitamins, iron and zinc, is a key strategy to  
26 alleviate child malnutrition. However, adverse events resulting in gastrointestinal disorders,  
27 largely associated with iron, has resulted in ongoing debate over their administration. To better  
28 understand their impact on gut microbiota, we analysed the bacterial, protozoal, fungal and  
29 helminth communities of stool samples collected from children that had previously been recruited  
30 to a cluster randomized controlled trial of micronutrient supplementation in Pakistan. We show  
31 that while bacterial diversity was reduced in supplemented children, vitamins and iron may  
32 promote colonization with distinct protozoa and mucormycetes, whereas the addition of zinc  
33 ameliorates this effect. In addition to supplements, residence in a rural versus urban setting is an  
34 important determinant of eukaryotic composition. We suggest that the risks and benefits of such  
35 interventions may be mediated in part through eukaryotic communities, in a manner dependent on  
36 setting.

37

38

## 39 **Introduction**

40 Malnutrition is a global health crisis with 149 million children stunted and 45 million children  
41 wasted under the age of five years<sup>1,2</sup>. With increased vulnerability to infection, undernourished  
42 children are at elevated risk of death, not least from diarrheal diseases<sup>3,4</sup>. Previous studies have  
43 demonstrated the role of gut microbiota in malnutrition, with microbiome immaturity (bacterial  
44 communities that are underdeveloped with respect to age) representing a key factor in disease  
45 development<sup>5,6</sup>. Beyond bacterial communities, parasites such as hookworm, *Cryptosporidium* and  
46 *Entamoeba* have also been associated with severe diarrheal disease and intestinal malabsorption<sup>7,8</sup>.  
47 However, much less is known regarding the role of other, potentially commensal, eukaryotic gut  
48 microbes in undernutrition. Of particular interest is their ability to interact with and alter bacterial  
49 communities. For example, indole-producing gut bacteria were found to confer protection against  
50 *Cryptosporidium* infection, while deworming treatments targeting helminth endemic communities  
51 reduced abundance of protective Clostridiales<sup>9,10</sup>. Mouse studies further showed that helminths  
52 and protozoa influence bacterial communities by modulating the host immune system<sup>9,11,12</sup>. While  
53 the number of published gut microbiome studies have increased rapidly over the last decade, few  
54 have explored the composition of eukaryotic gut communities and their potential interactions with  
55 bacteria. Previously, we applied 18S rRNA and internal transcribed spacer (ITS) sequence surveys  
56 to systematically characterize eukaryotic microbiota in severely malnourished Malawian children,  
57 and identified a high prevalence of protozoa, including commensals and pathobionts<sup>13</sup>. We  
58 furthermore associated *Blastocystis* colonization with increased gut bacterial diversity.

59

60 Global health programs targeting vulnerable child populations include the use of micronutrient  
61 supplements, consisting of vitamins as well as essential minerals zinc and iron, that have been

62 demonstrated to improve growth and reduce morbidity<sup>14-16</sup>. Such supplements are thought to  
63 address deficiencies that can impair immune responses to infectious pathogens and impact gut  
64 bacterial communities<sup>17-20</sup>. While beneficial, supplementation, especially with iron, may also  
65 promote unintended pathogen growth, particularly where the host is unable to restrict  
66 micronutrient bioavailability<sup>21</sup>. For example, it has been shown that surplus iron promotes the  
67 growth of enteropathogens and induces intestinal inflammation in infants<sup>22,23</sup>. Furthermore, while  
68 known to reduce the duration of childhood diarrheal episodes, zinc supplementation has been  
69 associated with increased duration of *Entamoeba histolytica* infections<sup>24,25</sup>.

70

71 In an attempt to understand the impact of micronutrient supplementation on the complex  
72 interactions between eukaryotic and bacterial microbiota in the maturing infant gut and health, we  
73 performed 18S rRNA and 16S rRNA amplicon surveys on stool samples obtained at 12 and 24  
74 months of age from 80 children, previously recruited as part of a cluster randomized trial conducted  
75 in Pakistan. The trial was designed to investigate the impact of micronutrient powders (MNP)  
76 containing vitamins and iron with or without zinc on growth and morbidity, and has shown an  
77 excess of significant diarrheal and dysenteric episodes among children receiving MNPs<sup>26</sup>.  
78 Microbial profiles were analysed in the context of supplementation, nutritional status, age and  
79 place of residence (i.e., urban or rural) to reveal a complex landscape of associations with microbial  
80 diversity, as well as specific taxa.

81

## 82 **Results**

### 83 **Description of cohort**

84 A total of 80 children (160 paired stool samples at 12 and 24 months of age) from all three  
85 supplementation arms in the parent cRCT<sup>26</sup> (control (n=24), MNP (n=29), and MNP with zinc  
86 (n=27)) conducted in Sindh, Pakistan were selected based on sample availability for inclusion in  
87 this study (Supplementary Fig. 1). The cohort includes children from both urban (Bilal colony)  
88 and rural (Matiari district) study sites (Fig. 1a). Children were stratified by weight-for-length z-  
89 scores (WLZ) at 24 months into a reference WLZ (WLZ >-1) or undernourished (WLZ < -2) group.  
90 Subject characteristics are summarized in Table 1. The WLZ growth trajectories of the children  
91 selected as the reference WLZ group approximately tracked the upper 50th percentile of the  
92 original cohort, while the undernourished group started around the lower 50th percentile and  
93 gradually dropped over time ending at the bottom 80<sup>th</sup> percentile of the cohort (Fig. 1b). This drop  
94 in the WLZ of the undernourished children was driven by poor weight gain (Supplementary Fig.  
95 2).

96

### 97 **The developing infant gut is colonized by complex eukaryotic communities**

98 We applied 18S rRNA amplicon sequencing to profile the eukaryotic communities in all 160 stool  
99 samples. We generated a total of 11,639,233 paired 18S rRNA amplicon sequence reads (median  
100 70,642) of which 4,386,494 could be classified as a eukaryotic microbe (median 22,932;  
101 Supplementary Table 1). From these we identified a total of 859 eukaryotic OTUs (median 66;  
102 Supplementary Table 1), which included 438 protozoan, three helminth and 418 fungal OTUs (Fig.  
103 2a). Fungi, dominated by Mucoromycota and Ascomycota, accounted for 71% of all reads. The  
104 most abundant were species in the *Candida-Lodderomyces* clade, *Saccharomyces*, and taxa  
105 increasingly associated with rare but fatal infections known as mucormycoses: *Rhizomucor*,  
106 *Actinomucor* and *Lichtheimia*. Alveolates accounted for 25% of reads, with

107 *Gregarina/Gregarinasina* and *Cryptosporidium* as the most abundant (5% and 3%, respectively).  
108 Remaining reads were classified to numerous taxa, including known gut parasites such as  
109 *Enterocytozoon bieneusi*, *Pentatrichomonas hominis* and the tapeworm *Hymenolepis nana*, as well  
110 as uncharacterized alveolates, Amoebozoa and Cercozoa (Supplementary Table 2).

111  
112 Protozoa were highly prevalent, with 89% of children colonized by at least one protozoan organism  
113 by 12 months of age, and 92% by 24 months of age (Fig. 2b). Carriage of multiple species was  
114 common in both the reference WLZ and undernourished groups, with on average 18 and 19 OTUs  
115 per child at each time point, and a maximum of 91. A high detection of gregarines, typically  
116 considered parasites of invertebrates, has not previously been reported in the human gut. In our  
117 cohort, gregarine sequences accounted for nearly 230,000 reads and were identified in 69% and  
118 71% of children at 12 and 24 months of age (Fig. 2b).

119  
120 **Micronutrient supplementation without zinc is associated with increased carriage of**  
121 **protozoa and mucormycetes**

122 Protozoan microbiota were significantly associated with place of residence, micronutrient  
123 supplementation and/or nutritional status, but not age. Children residing in the rural study site had  
124 increased protozoan richness (number of OTUs) compared to those from the urban setting ( $\beta = 11$ ,  
125 CI [5.3 – 16.6],  $p < 0.001$ ) (Fig. 2c). Differences were attributed to higher carriage of  
126 predominantly alveolate taxa, particularly *Cryptosporidium* (Fisher's exact, CI [2-11],  $p < 0.01$ ,  
127 OR 4.9), species known to cause enteric symptoms (Fig. 2d). When stratifying by age group, only  
128 *Cryptosporidium* and two OTUs classified as unknown Conoidasida, with 93% sequence identity  
129 to *Cryptosporidium*, reached statistical significance at 24 months, with 2.4 and 9.6-fold higher

130 carriage, respectively, in children from rural settings (Fisher's exact, CI [2.5-29],  $p < 0.05$ , OR  
131 8.1; CI [2-670],  $p < 0.05$ , OR 15.2).

132

133 While we observed trends in increased fungal and protozoan richness in the undernourished cohort  
134 (Fig. 2c), only the tapeworm *Hymenolepis nana* was detected with overall significantly higher  
135 frequency in undernourished children (Fisher's exact, CI [2-23],  $p < 0.05$ , OR 6.2) (Fig. 2d). At  
136 12 months, detections were only 2% and 3% in reference WLZ and undernourished children,  
137 respectively. However, by 24 months, carriage increased to 8% in reference WLZ and 43% in the  
138 undernourished group ( $ns$  after multiple testing correction). We also observed trends of increased  
139 carriage of *Cryptosporidium* and *Cryptosporida* (coccidians), represented by 46 OTUs in total, in  
140 undernourished children (74% versus 65% at 12 months and 71% versus 61% at 24 months;  $ns$ )  
141 (Fig. 2b). Furthermore, undernourished children receiving MNP with zinc had significantly fewer  
142 protozoan OTUs relative to undernourished children in the control and MNP arms ( $\beta = -15.19$ , CI  
143 [-29.27 – -1.12],  $p < 0.05$ ), suggesting a possible inhibitory effect by the metal (Fig. 2c,  
144 Supplementary Fig. 3).

145

146 Analysis of compositional differences among samples revealed four distinct clusters of protozoan  
147 communities (Fig. 2e). The overall compositional variance was significantly explained by place of  
148 residence (adonis,  $R^2$  0.02,  $p < 0.05$ ) and micronutrient supplementation (adonis,  $R^2$  0.09,  $p <$   
149 0.001), where protozoan communities in children supplemented with MNP differed significantly  
150 from those in control and MNP with zinc arms (MNP-CTL,  $R^2$  0.05,  $p < 0.01$ ; MNP-MNP with  
151 zinc  $R^2$  0.04,  $p < 0.01$ ). Cluster 1, in particular, was enriched in MNP samples,  $X^2$  (6,  $N = 114$ ) =  
152 38.5,  $p < 0.001$  (Fig. 2f). Key drivers of the diversity included *Tritrichomonas*, detected almost

153 exclusively in samples found in clusters 1 and 3 (correlation coefficient  $R^2$  0.21,  $p = 0.001$ ), and  
154 an OTU assigned to an unknown alveolate found predominantly in clusters 1 and 2 ( $R^2$  0.17,  $p =$   
155 0.001). These organisms were highly prevalent in both age groups, at 42% and 45%  
156 (*Tritrichomonas*) and 20% and 21% (unknown alveolate). Fungal richness and phylogenetic  
157 composition were not associated with any of the variables studied here.

158

159 We identified significantly higher carriage of seven phylogenetically distinct protozoa and six  
160 fungi in children receiving MNPs without zinc, relative to those that were given zinc (six protozoa  
161 and six fungi relative to the control group; Fig. 2d). Indeed, we noted a trend where MNP with  
162 zinc reduced carriage of microbial eukaryotes to or below that observed in the control samples.  
163 For example, *Gregarina* and an uncharacterized alveolate, which contributed to the previously  
164 observed differences in beta diversity (Fig. 2e), were detected with 1.8 and 3.8-fold higher  
165 frequency in the MNP group, with no differences between samples from the control and MNP with  
166 zinc groups. Similarly, the carriages of three mucormycete genera (*Rhizomucor*, *Actinomucor* and  
167 *Mucor*) were 1.3, 1.5 and 1.8-fold higher, respectively, in the MNP group compared to the control,  
168 with no significant differences between the control and MNP with zinc groups. *Toxoplasma* was  
169 the only genus with significantly reduced carriage in children receiving MNP with zinc; however,  
170 we observed non-significant reductions in other organisms such as *Cercomonas* and *Mucor* (2 and  
171 1.4-fold, respectively) suggesting possible species-specific effects. Despite previous reports of the  
172 impact of zinc on helminths<sup>24</sup>, we did not detect significant differences in the carriage of the  
173 tapeworm *Hymenolepis nana* among treatment arms.

174

175 **Micronutrient supplements are associated with specific bacterial communities**



176 Using 16S rRNA amplicon sequencing, we also profiled the stool bacterial microbiota. From the  
177 13,984,120 sequenced reads (median 92,628), we identified 1108 bacterial OTUs across all 160  
178 samples (median 50; Supplementary Table 3). Actinobacteria and Firmicutes were found to  
179 dominate with just two OTUs (both assigned to *Bifidobacterium*) accounting for over 50% of all  
180 reads (Fig. 3a, Supplementary Table 4). Age was the primary determinant of bacterial richness ( $\beta$   
181 = 43.65, CI [31.98 – 55.31],  $p < 0.001$ ) and evenness ( $\beta = 0.80$ , CI [0.59 – 1.02],  $p < 0.001$ ) (Fig.  
182 3b, Supplementary Fig. 4,) as well as patterns of taxonomic composition as measured by Bray-  
183 Curtis and weighted Unifrac dissimilarities (Fig. 3c; adonis,  $R^2$  0.06,  $p < 0.001$ ;  $R^2$  0.05,  $p < 0.001$ ).  
184 Regression of dissimilarities in each child over time using partial correspondence analysis  
185 indicated that 56% of Bray-Curtis and 59% of weighted Unifrac changes may be attributed to age.  
186 By correlating the abundances of bacterial taxa with the first two axes of the Bray-Curtis  
187 ordination, we identified the candidate drivers of community differences as the two dominant  
188 *Bifidobacterium* species, with opposite abundance patterns perhaps suggesting succession of one  
189 species by the other.

190

191 Consistent with a previous study<sup>27</sup>, bacterial richness was reduced in undernourished children ( $\beta$   
192 = -29.19, CI [-52.99 – -5.39],  $p < 0.05$ ), while a significant interaction between nutritional status  
193 and place of residence indicated that bacterial evenness was reduced in undernourished children  
194 from the urban setting ( $\beta = 1.03$ , CI [0.11 – 1.95],  $p < 0.05$ ) (Fig. 3b, Supplementary Fig. 4b). We  
195 detected no significant association between nutritional status and locality and bacterial beta  
196 diversities in this cohort.

197

198 Treatment with MNPs was associated with an overall increased abundance of Actinobacteria in  
199 children at 12 months compared to the control group and those receiving MNP with zinc ( $\beta =$   
200 36020, CI [7239 – 64802],  $p < 0.05$ ), but reduced abundance in the MNP group at 24 months ( $\beta =$   
201 -52670, CI [-93373 – -11966],  $p < 0.05$ ) (Fig. 3d). Firmicutes were reduced in the presence of zinc  
202 in both age groups ( $\beta = -261976$ , CI [-476591 – -47362],  $p < 0.05$ ), with a non-significant reduction  
203 in those supplemented without zinc ( $\beta = -206413$ , CI [-416049 – 3221],  $p = 0.055$ ).  
204 Supplementation tended to reduce overall bacterial richness with an effect that reached  
205 significance in the MNP group ( $\beta = -14.66$ , CI [-29.01 – -0.31],  $p < 0.05$ ) (Fig. 3b) and influenced  
206 taxonomic composition as measured by weighted Unifrac (adonis,  $R^2$  0.03,  $p < 0.01$ ) but not Bray-  
207 Curtis dissimilarities. Specifically, phylogenetic variance differed among groups ( $p < 0.001$ ), with  
208 significantly smaller differences among 12 month old children receiving MNP and MNP with zinc  
209 (Tukey posthoc,  $p < 0.01$ ) (Fig. 3e, Supplementary Fig. 4c). This may suggest that micronutrients  
210 support or restrict the growth of select taxa. Through differential abundance analysis, we identified  
211 14 taxa with reduced abundances in both supplemented groups at 12 months compared to controls,  
212 including over 10-fold reductions in *Anaerostipes*, *Anaerosalibacter* and *Clostridium* XI (Fig. 3f).  
213 Two additional *Anaerostipes* OTUs were reduced in supplemented groups at both ages, with six  
214 OTUs reduced at 24 months only. MNP with zinc was associated with changes in an additional 46  
215 taxa, and 29 taxa were altered in MNP samples. These included a seven-fold increase in  
216 *Escherichia-Shigella* abundance in 12 month old MNP-supplemented children, increases in  
217 several Lactobacilli and a 1.3-fold reduction in one *Bifidobacterium* OTU (Fig. 3g). These data  
218 reveal that micronutrient supplementation may impact bacterial communities during early  
219 development.  
220

221 **MNPs may destabilize microbial interactions in undernourished infants.**

222 Microbial interaction networks were constructed to define significant taxonomic co-occurrences  
223 (Fig. 4). We found that interactions, calculated as edges per node, increased with age irrespective  
224 of treatment, nutritional status or place of residence, which reflects the development of more  
225 complex communities as the child matures (Fig. 4a). The greatest change, with a 2.5-fold increase,  
226 was noted in children in the MNP arm, which had the fewest taxon interactions at 12 months but  
227 achieved parity with the control and MNP with zinc groups by 24 months. Cross-kingdom  
228 interactions between bacteria and eukaryotes represented 20% to 30% of all interactions at 12  
229 months, falling to between 15% and 24% by 24 months of age (Fig. 4b).

230

231 When split by nutritional status, we observed important differences in the networks of 12 month  
232 old undernourished infants supplemented with micronutrients compared to the control and  
233 reference WLZ groups (Fig. 4c,d). Within control groups, the microbial networks of  
234 undernourished infants and those within the reference WLZ group had similar levels of  
235 connectivity, with non-significant differences in degree distribution and betweenness centrality  
236 scores. While children in the reference WLZ group receiving either supplement were associated  
237 with small but significant reductions in microbiota betweenness (Wilcoxon rank sum,  $p < 0.05$  and  
238  $p < 0.01$ ), greater reductions were observed in supplemented undernourished children (Wilcoxon  
239 rank sum,  $p < 0.001$ ). Since betweenness provides a measure of the degree of coordination within  
240 a network, these findings suggest that micronutrient supplementation, with or without zinc, results  
241 in microbial communities that are less organized at 12 months of age. This is further illustrated by  
242 the network visualizations (Fig. 4e), where, in addition to changes in network density, we also  
243 identified shifts in taxa with the highest betweenness values (which can be interpreted as those

244 taxa most likely to mediate important coordinating roles within the communities). For example,  
245 within the control group, Clostridia, two species of Mucoromycota and the ciliate *Bromeliothrix*  
246 occupy central roles in the network of reference WLZ infants, while in undernourished infants  
247 these central roles are held by *Trichosporon*, *Longamoeba* and *Prevotella*. In supplemented  
248 reference WLZ groups, Bacilli exhibit the highest betweenness values in the absence of zinc, while  
249 these are replaced by Proteobacteria in the communities from infants receiving MNP with zinc.  
250 However, within undernourished infants receiving either supplement, microbial networks appear  
251 largely fragmented (Fig. 4e), with dramatically lower degree distributions and betweenness  
252 compared to the control group suggesting that early treatment with micronutrient powders may  
253 destabilize a fragile microbial community. Comparison of microbial networks by location of  
254 residence further showed an increased density of interactions within each rural group (control or  
255 supplemented) compared to the urban groups (Supplementary Fig. 5). Low subject numbers  
256 precluded us from successfully generating networks at 24 months, where numbers of microbial  
257 taxa are greater.

258

259 **Complex cross-kingdom interrelationships over time are more influenced by place of**  
260 **residence than early supplementation**

261 Based on our findings, we hypothesized that direct effects of supplementation and place of  
262 residence on microbial communities at 12 months could translate to indirect influence on later  
263 microbial profiles. We further hypothesized that early exposure to eukaryotes (before or at 12  
264 months of age) would change the course of bacterial microbiome maturation. To explore the  
265 complex direct and indirect interrelationships among these factors, we generated an integrated  
266 model using partial least squares (PLS) path modelling (Fig. 5, Supplementary Table 5). First,

267 place of residence had strong direct and indirect influences on eukaryotic and bacterial profiles at  
268 both 12 and 24 months. The greatest direct effects were on eukaryotic composition (12mo, path  
269 coefficient  $0.52 \pm 0.09$ ,  $p < 0.0001$ ; 24 mo, path coefficient  $0.48 \pm 0.1$ ,  $p < 0.0001$ ). Consistent with  
270 our findings above, children from the rural community had increased levels of several alveolates  
271 including *Cryptosporidium* at 12 and 24 months (12 months, 0.40 loading; 24 months 0.69  
272 loading). While there was no significant direct effect on bacteria at 12 months (path coefficient  
273  $0.17 \pm 0.12$ ,  $p = 0.15$ ), the locality indirectly influenced bacterial composition via eukaryotes  
274 (indirect path coefficient of 0.14 with a total effect of 0.31 at 12 months). Children from the rural  
275 community loaded positively for several *Clostridium* OTUs at both ages, and sustained higher  
276 levels of *Lactobacillus* at 24 months. Micronutrient supplementation appeared to influence the  
277 composition of eukaryotes and bacteria in an opposing manner to place of residence at 12 months  
278 (path coefficient  $-0.27 \pm 0.11$ ,  $p = 0.014$ ; path coefficient  $-0.27 \pm 0.09$ ,  $p = 0.0058$ ), with possible  
279 carryover effects to microbial compositions at 24 months (indirect effects of -0.11). Also consistent  
280 with our findings, *Mucor* and *Euglyphida* correlated with supplementation at 12 months (-0.35 and  
281 -0.34 cross-loadings, respectively).

282  
283 Eukaryotic profiles at 12 months of age were significantly associated with a shift in bacterial  
284 profiles at 12 months suggesting possible cross-kingdom interactions (Fig. 5, arrow 1; path  
285 coefficient  $0.27 \pm 0.12$ ,  $p = 0.033$ ). These bacteria, in turn, exhibited a significant influence on  
286 eukaryotic composition at 24 months (Fig. 5, arrow 4; path coefficient  $0.21 \pm 0.095$ ,  $p = 0.033$ ).  
287 Differences in path coefficients were also tested in a stratified analysis of reference WLZ and  
288 undernourished children but none reached statistical significance in our cohort. While the pathway  
289 coefficients identified above were found to be statistically significant, due to large standard errors

290 likely resulting from heterogeneity and small sample size, we were unable to validate this support  
291 using more robust bootstrapping procedures (Supplementary Table 5). Nevertheless, given the  
292 consistency of these relationships with our earlier findings, this model provides additional support  
293 for the indirect association of MNP supplementation and bacterial communities mediated through  
294 the promotion of specific eukaryotic microbes.

295

## 296 **Discussion**

297 Malnutrition, both undernutrition and obesity, are associated with altered bacterial compositions,  
298 where in the former, underdeveloped bacterial communities have the capacity to induce weight  
299 loss<sup>6,28</sup>. Here, we have shown that the gut microbiota of both undernourished children and those  
300 within a healthy weight range include a diverse group of protozoa, helminths and fungi, each with  
301 the capacity to impact host health. We have also shown that supplementation with MNPs, a  
302 strategy used to improve growth and alleviate micronutrient deficiencies<sup>14,16</sup>, has the capacity to  
303 influence the development of the microbiome in these susceptible populations.

304

305 Consistent with previous studies, we found that bacterial communities became more complex  
306 during growth. Eukaryotic communities, however, were not significantly impacted by age, but  
307 instead were associated with micronutrient supplementation and place of residence. Only the  
308 tapeworm *H. nana* was identified at significantly higher levels in undernourished children. While  
309 *H. nana* infection is usually asymptomatic, high egg burdens in children have previously been  
310 associated with diarrhea, abdominal pain and weight loss<sup>29</sup>, with exacerbated morbidity in children  
311 <5 years<sup>30</sup>. We associated rural habitation with significantly more diverse protozoan communities,  
312 and in particular increased prevalence of *Cryptosporidium*. An important cause of infant mortality

313 and childhood malnutrition, *Cryptosporidium* infection is attributed to unsafe drinking water and  
314 inadequate sanitation often associated with rural settings<sup>26,31</sup>. While approximately half of all  
315 children enrolled in the trial had access to piped drinking water (41% and 52% in the urban Bilal  
316 colony and rural Matiari sites respectively), only 4% of children in the Matiari district had access  
317 to underground sewage, compared to 95% in the Bilal Colony<sup>26</sup>, consistent with a lack of waste  
318 water sanitation resulting in higher parasite carriage. While the large multicenter GEMS study  
319 reported *Cryptosporidium* as a leading cause of death in 12 to 23 month old children with moderate  
320 to severe diarrhea in developing countries<sup>32</sup>, we found a high prevalence of this parasite in absence  
321 of diarrhea (80% and 83% at 12 and 24 months in the Matiari district, and 60% and 33% in the  
322 Bilal urban colony). As our detection is based on 18S rRNA amplicon sequencing, we may have  
323 detected a broader group of species of variable pathogenic potential compared to the GEMS study,  
324 which applied a specific oocyst antigen immunoassay. Alternatively, our findings may indicate a  
325 high prevalence of asymptomatic infections, with symptomatic infections resulting from additional  
326 unknown factors<sup>7,33</sup>. The prevalence of *Cryptosporidium* in our cohort was also higher than  
327 previously reported in non-diarrheal stools, using oocyst antigen testing, in the neighbouring  
328 Naushero Feroze District (5.1% between 12 and 21 months of age), where *Cryptosporidium*  
329 contributed to 8.8 diarrheal episodes per 100 child years<sup>34,35</sup>. This same study associated  
330 asymptomatic enteropathogen infection, including *Cryptosporidium* and *Giardia*, across eight  
331 countries with elevated inflammation and intestinal permeability, factors thought to increase risk  
332 of stunting and impact the effectiveness of nutritional interventions in low-resource settings<sup>35</sup>.  
333  
334 A major focus of our study was to estimate the effect of micronutrient supplementation on the gut  
335 microbiota. We found that children receiving supplements without zinc were associated with

336 distinct eukaryotic communities, featuring an increased prevalence of multiple protozoan and  
337 fungal taxa; however, the addition of zinc to these supplements alleviated these increases, while  
338 significantly reducing the prevalence of *Toxoplasma* and overall protozoan richness. These  
339 findings are consistent with a previous report which suggested that zinc has a parasite-specific  
340 protective effect against infection and ensuing diarrhea<sup>24</sup>. Fungal diversity was not impacted by  
341 age, supplementation, place of residence or nutritional status. However, the predominance of  
342 Mucoromycota, particularly in children receiving MNPs without zinc, is of concern, as these  
343 organisms are responsible for rare but lethal invasive fungal infections that have previously been  
344 reported in low birth weight infants and malnourished children<sup>36</sup>. Although incidence of infections  
345 is rising globally, rates of mucormycoses are particularly high in Asia<sup>37</sup>. Notably, a recent spike in  
346 infections, also termed ‘Black fungus’, in thousands of active and recovered Covid-19 patients in  
347 India, was attributed to treatment with corticosteroids to control inflammation, in conjunction with  
348 a high prevalence of diabetes<sup>38</sup>.

349  
350 It has been well established that iron supplementation can promote the virulence of particular fungi  
351 and parasites<sup>39,40</sup>. Several studies have shown that iron alone or in combination with other  
352 micronutrients worsens existing infections, lengthens the duration and severity of diarrhea and  
353 increases mortality rates in children<sup>22,26,39</sup>. Consequently, sequestration of free iron by host  
354 proteins such as lactoferrin is a key defense mechanism to limit growth of pathogens including  
355 Mucorales<sup>41</sup>. Iron deficiency has furthermore been suggested as protective against malaria  
356 infection<sup>42,43</sup>, and provision of supplements containing iron in endemic regions has been cautioned  
357 against due to increased malaria-related hospitalization and mortality of children<sup>39</sup>. While  
358 deficiency in zinc has been associated with impaired immune function and susceptibility to



359 enteroinfections<sup>44</sup>, supplementation in the context of enteric pathogens was shown to have  
360 parasite-specific outcomes. Provision of zinc alone can increase the incidence of *Ascaris*  
361 *lumbricoides* and duration of *Entamoeba histolytica* infections, but it has also been shown to  
362 reduce the duration of associated diarrheal episodes as well as lower the prevalence of *Giardia*  
363 *lamblia* infections<sup>24</sup>. Interestingly, asymptomatic *Giardia* infections in children in Tanzania were  
364 associated with reduced rates of diarrhea and fever, an effect which was lost in children receiving  
365 vitamin and mineral supplements, including both iron and zinc<sup>45</sup>. Our data suggest that while iron,  
366 vitamins, or both, may promote growth and survival of commensal and potentially pathogenic  
367 eukaryotes, resulting in a shift in eukaryotic community structure, the addition of zinc may reduce  
368 the ability of at least some eukaryotic microbes to infect and persist. The findings of reduced  
369 bacterial diversity in 12 month old infants receiving micronutrient supplements, together with  
370 elevated levels of *Escherichia-Shigella* and reduced beneficial *Bifidobacteria*, are also consistent  
371 with previous reports, where reductions in beneficial *Bifidobacterium* and *Lactobacilli* and  
372 increased enterobacteria in infants receiving iron-containing micronutrients were linked to  
373 elevated risk of inflammation and diarrhea<sup>22,23,46</sup>. The original cRCT trial associated *Aeromonas*  
374 infection with increased diarrhea in MNP supplemented groups<sup>26</sup>. We did not detect this bacterium  
375 in our data, possibly due to exclusion of diarrheal samples.

376

377 The impact of micronutrient supplementation also extended to the structure of the microbial  
378 communities. Microbial networks, representing significant correlations in the co-occurrence of  
379 bacteria and eukaryotes, revealed higher network connectivity in the control groups, with the  
380 networks generated from the undernourished infants receiving both types of supplements,  
381 revealing a more fragmented structure. This fragmentation suggests a destabilization of species-

382 interactions within the developing gut microbiota in undernourished infants. Possibly contributing  
383 to this destabilization is the presence of specific eukaryotic microbes, as evidenced by higher  
384 proportions of eukaryotic-bacterial interactions in healthy infants receiving either supplement,  
385 and/or the expansion of pathogenic bacteria. These microbes may interfere with the maturation of  
386 commensal bacteria through predation, competition for resources and/or modulation of host  
387 immunity. In undernourished infants, the cumulative effect of increases in pathogenic organisms  
388 on community structure may be more pronounced than in infants within a healthy weight.  
389 Enteropathogens *Giardia lamblia* and enteroaggregative *Escherichia coli*, for example, were  
390 shown to have a greater impact on growth in protein-deficient mice during co-infection, an effect  
391 which was dependent on the resident gut bacteria<sup>47</sup>. Taken together, our data showing increased  
392 carriage of eukaryotic microbes and increased abundance of *Escherichia-Shigella* in children  
393 supplemented with micronutrients, as well as a potential loss of organization in microbial  
394 interactions in supplemented undernourished children, may offer at least a partial explanation for  
395 previous reports of increased duration and severity of diarrhea as well as increased intestinal  
396 inflammation in children supplemented with micronutrient powders<sup>26</sup>.

397  
398 Due to the relatively small numbers of samples, we were unable to generate separate networks for  
399 the three treatment arms for 24 month old children. We note that supplementation had ceased six  
400 months prior, consequently the acute effects of these supplements may have dissipated. Small  
401 sample sizes also preclude us from further segregating microbial networks by place of residence.  
402 Micronutrient interventions may impact undernourished children differently in the context of a  
403 high *Cryptosporidium* burden, for example. The notable absence of *Giardia*, a parasite typically  
404 prevalent in this demographic, is likely due to mismatches to the 18S rRNA sequencing primers<sup>13</sup>.

405 Nevertheless, parasite diagnostic data from the trial did identify *Giardia* in 37 infants at 12 months,  
406 and *Cryptosporidium* in seven, but noted no significant increases in either of the supplemented  
407 groups<sup>26</sup>. Prevalence was nearly two-fold higher at the rural site, consistent with our findings for  
408 *Cryptosporidium*, emphasizing the need for location-specific investigations of the effects of  
409 micronutrient supplements. In addition to potential intraspecies variation, our detection of high  
410 sequence diversity in *Cryptosporidium* OTUs specifically, and eukaryotic taxa in general, may be  
411 exaggerated by a high proportion of non-overlapping amplicon reads, a consequence we have  
412 attempted to minimize through manual curation. Regardless, we report that eukaryotic microbiota  
413 are abundant members of the gut microbiome even in infancy, and given the known role of  
414 parasitic pathogens in diarrheal disease and the association of fungi with obesity and inflammatory  
415 bowel disease<sup>48,49</sup>, their role in malnutrition should be further studied.

416  
417 Although not supported by robust bootstrapping, our integrated model of microbial relationships  
418 and influencing external factors was able to recapitulate a number of key earlier findings, including  
419 the impact of locality and micronutrients on gut eukaryotes. Furthermore, the prediction from our  
420 model that complex cross-kingdom interactions may influence gut bacterial composition, provides  
421 a valuable framework to dissect the direct and indirect effects of eukaryotic infections or nutritional  
422 interventions on the maturing gut microbiome. Given the current debate over the use of MNP  
423 supplementation and its role in gastrointestinal disorders, such a framework is expected to play a  
424 key role in identifying scenarios where MNP supplementation may require more cautious thinking.

425

## 426 **Conclusion**

427 This study demonstrates that micronutrient powders impact the infant microbiota, with potentially  
428 destabilizing effects driven through the promotion of specific organisms during early stages of  
429 microbiome development. These findings are of relevance to micronutrient supplementation  
430 strategies, especially those targeting vulnerable children in low resource settings.

431

## 432 **Methods**

### 433 **Study design and subject selection**

434 Study participants were selected from a multicenter clustered randomized controlled trial  
435 (ClinicalTrials.gov identifier NCT00705445) that investigated the effects of micronutrient  
436 supplementation with or without zinc among 2746 children from either an urban (Bilal colony,  
437 squatter settlement within Karachi) or rural (Matiari district, 200 km from Karachi) site in Sindh,  
438 Pakistan<sup>26</sup>. In the trial, daily supplementation with micronutrient powders (MNP) containing  
439 vitamins A, C, D, folic acid and microencapsulated iron, with or without zinc spanned 6 to 18  
440 months of age, with prospective follow-up until 24 months for the collection of health and  
441 demographic information and stool samples<sup>26</sup>. Eighty children were selected for microbiome  
442 profiling according to the following criteria (Supplementary Fig. 1): 1) having stool samples  
443 collected at 12 and 24 months of age available and archived at -80°C; 2) having at 24 months a  
444 weight-for-length z-score (WLZ) < -2 below the median (undernourished) or > -1 (reference WLZ)  
445 based on WHO 2006 growth references ([www.who.int/childgrowth](http://www.who.int/childgrowth)); 3) no record of antibiotic  
446 administration within 14 days of stool sample collection; and, 4) no reported diarrhea within seven  
447 days of stool collection. Subjects within the reference group were further selected based on fewest  
448 WLZ scores < -1 at other time points, to represent as healthy as possible a comparator group.

449 Participant characteristics were summarized as medians with interquartile ranges (IQRs) or means  
450  $\pm$  standard deviations (SD) if continuous variables, and percentages if categorical.

451

#### 452 **DNA extraction and amplicon sequencing**

453 DNA was extracted from 100-200 mg of stool using the E.Z.N.ATM Stool kit (Omega Bio-Tek  
454 Inc, GA, USA) according to the manufacturer's protocol. Mechanical disruption of cells was  
455 carried out with the MP Bio FastPrep-24 for 5 cycles of 1 min at 5.5 M/s. 16S variable region 4  
456 (V4) amplifications were carried out using the KAPA2G Robust HotStart ReadyMix (KAPA  
457 Biosystems) and barcoded primers 515F and 806R<sup>50</sup>. The cycling conditions were 95°C for 3 min,  
458 22 cycles of 95°C for 15 s, 50°C for 15 s and 72°C for 15 s, followed by a 5 min 72°C extension.  
459 Libraries were purified using Ampure XP beads and sequenced using MiSeq V2 (150bp x 2)  
460 chemistry (Illumina, San Diego, CA). 18S V4+V5 amplification was achieved using the iProof  
461 DNA polymerase (Bio-Rad Laboratories, Hercules, CA) with primers V4-1 and V4-4 as  
462 previously described<sup>13</sup>. Briefly, the cycling conditions used were 94°C for 3 min, 30 cycles of  
463 94°C for 45 s, 56°C for 1 min and 72°C for 1 min, followed by a 10 min 72°C extension. Barcodes  
464 were ligated and libraries were sequenced using MiSeq V3 (300bp x 2) chemistry (Illumina, San  
465 Diego, CA). Sequencing was performed at the Centre for the Analysis of Genome Evolution and  
466 Function (Toronto, Canada).

467

#### 468 **Sequence data analysis**

469 16S data were quality filtered and processed using VSEARCH v2.10.4<sup>51</sup> and the UNOISE pipeline  
470 in USEARCH v11.0.667<sup>52,53</sup>. Filtered sequences were clustered to 99% sequence identity, and the

471 resulting operational taxonomic units (OTUs) were classified with a minimum confidence of 0.8  
472 using the SINTAX<sup>54</sup> algorithm and the Ribosomal Database Project version 16<sup>55</sup>.  
473  
474 18S data were quality filtered using Trimmomatic v0.36<sup>56</sup> and read pairs with minimum 200  
475 nucleotide length were merged using VSEARCH, or artificially joined using a linker of 50  
476 ambiguous nucleotides (N<sub>50</sub>) using USEARCH. Resultant amplicon sequences were clustered to  
477 97% sequence identity using the UCLUST<sup>52</sup> algorithm, and taxonomically classified using SINA  
478 v1.2.11<sup>57</sup> with a minimum 90% sequence similarity threshold. Unclassified sequences were  
479 submitted for classification using SINTAX and the SILVA v132 non-redundant reference  
480 database<sup>58</sup>, and those still unclassified were compared to the NCBI non-redundant nucleotide  
481 database<sup>59</sup> (downloaded Nov 28, 2017) by BLAST<sup>60</sup> using a 90% cutoff for both sequence identity  
482 and query coverage. Phylogenetic tree construction for both 16S and 18S OTUs was performed  
483 using the FastTree<sup>61</sup> algorithm and visualized using the Iroki viewer<sup>62</sup>, with taxon prevalence  
484 values calculated at a minimum threshold of 5 reads.

485

#### 486 **Microbial diversity and differential abundance analyses**

487 Microbiota richness (number of OTUs) and evenness (Shannon Diversity Index, H) were  
488 calculated using Phyloseq 1.20.0<sup>63</sup>. Rarefaction curves were generated at 100 read intervals to a  
489 maximum of 5,000 or 50,000 for eukaryotes and bacteria, respectively. Values were averaged and  
490 standard errors calculated by the grouping variable. As intra-class correlation was low, we  
491 implemented generalized linear models (GLMs) using richness and evenness values averaged from  
492 100 independent rarefactions at read depths of 25,000 (bacteria) and 1,000 (protozoa and fungi).  
493 To identify a final model that best explains diversity, we performed stepwise model selection using

494 AIC with MASS<sup>64</sup> with the following explanatory variables: age, nutritional status,  
495 supplementation and urban versus rural site.

496

497 Differences in bacterial composition, based on Bray-Curtis and weighted Unifrac dissimilarity  
498 scores, were calculated with Phyloseq and vegan<sup>65</sup> using DESeq2-normalized counts prefiltered  
499 for taxa represented by a minimum of 5 reads in at least 5% of the samples. The contribution of  
500 age to beta diversity was calculated using the capscale function, and the remaining variables were  
501 tested for significance in age-stratified samples using adonis. The compositional variance within  
502 groups, measured as distances to centroids, was evaluated using the betadisper function, and  
503 pairwise differences were delineated using a post hoc Tukey test. All adonis and betadisper tests  
504 were carried out with 9999 permutations. We applied non-metric dimensional scaling (NMDS) to  
505 ordinate samples based on their compositional dissimilarity. The envfit function was used to  
506 identify taxa significantly correlated with the first two ordination axes (candidate drivers of  
507 community differences), indicated by arrows in the direction of cosines and scaled by the root  
508 square of the correlation. Protozoan and fungal beta diversities were evaluated at 1000 read depth  
509 using Principal Coordinate Analysis of unweighted Unifrac scores, and significance was tested as  
510 above. Differential taxon abundance was tested with DESeq2 1.22.2<sup>66</sup> in samples containing a  
511 minimum of 1000 reads, using data internally transformed with the median of ratios method.

512

513 Fisher's Exact or pairwise test from the rstatix package was used to evaluate differences in  
514 eukaryote carriage among participant groups, using a minimum 5 read detection threshold per  
515 OTU and grouping OTUs to the genus level or the lowest assigned taxonomic level. Benjamini-  
516 Hochberg correction was applied for multiple testing.

517

## 518 **Microbial interaction networks**

519 Bacterial and eukaryotic datasets were rarefied to 25,000 and 1,000 reads, respectively, and  
520 eukaryotes were agglomerated to genera or the lowest assigned taxonomic level. Microbial  
521 interaction networks, including both microbial datasets simultaneously, were generated using  
522 SpiecEasi<sup>67</sup> with the neighbour selection (MB) method, nlambda 100 and lambda.min.ratio 1e-02,  
523 and visualized using igraph<sup>68</sup>.

524

## 525 **Partial least squares path analysis**

526 To explore the complex system of direct and indirect relationships between micronutrient  
527 supplementation, place of residence and the multivariate matrices of bacteria and eukaryotes over  
528 time, we conducted partial least squares (PLS) path analysis using the plsmp package in R<sup>69</sup>.  
529 Microbial read counts were center-log transformed after pre-filtering for taxa with more than  
530 0.01% abundance across all samples. The analysis was set to collapse the high dimensional  
531 microbial community matrices into latent PLS-scores representing community patterns of 1)  
532 eukaryotes at 12 months, 2) eukaryotes at 24 months, 3) bacteria at 12 months and 4) bacteria at  
533 24 months. The analysis estimates the relationships between factors based on cross correlations,  
534 e.g. how eukaryotes detected at 12 months load into a community pattern summarized by a latent  
535 PLS-score (i.e. “Eukaryotes, 12 mo”) in a manner that optimises the cross-correlation with the  
536 other variables (i.e. supplementation, place of residence and other community patterns). Path  
537 coefficients indicate the strength of the internodal relationship and can be conceptually understood  
538 as correlation coefficients. Bootstrapping procedures were followed for validation and differences  
539 in path coefficients were also tested between nutritional groups.



540

541 All microbial data and statistical analyses were carried out with R version 4.0.2<sup>70</sup>.

542

### 543 **Ethics Approval**

544 The protocol for the cRCT trial was approved by the Ethics Review Committee of Aga Khan  
545 University (752-Peds/ERC-07). This sub-study protocol was approved by research ethics board at  
546 The Hospital for Sick Children, Toronto (REB No. 1000054244), the ethics review committee at  
547 Aga Khan University, Karachi, Pakistan (4840-Ped-ERC-17), and the National Bioethics  
548 Committee Pakistan (4-87/NBC-277/17/1191).

549

### 550 **Data availability**

551 Raw sequence data have been deposited to the NCBI Sequence Read Archive with the BioProject  
552 identifier PRJNA717317.

553

554

## 555 References

- 556 1 Global Nutrition Report: Action on equity to end malnutrition., (Bristol, UK, 2020).  
557 2 (UNICEF), U. N. C. s. F., Organization, W. H. & Bank, I. B. f. R. a. D. T. W. Levels and trends in child  
558 malnutrition: key findings of the 2021 edition of the joint child malnutrition estimates., (Geneva,  
559 2021).
- 560 3 Black, R. E. *et al.* Maternal and child undernutrition and overweight in low-income and middle-  
561 income countries. *Lancet* **382**, 427-451, doi:10.1016/S0140-6736(13)60937-X (2013).
- 562 4 Liu, L. *et al.* Global, regional, and national causes of under-5 mortality in 2000-15: an updated  
563 systematic analysis with implications for the Sustainable Development Goals. *Lancet* **388**, 3027-  
564 3035, doi:10.1016/S0140-6736(16)31593-8 (2016).
- 565 5 Subramanian, S. *et al.* Persistent gut microbiota immaturity in malnourished Bangladeshi  
566 children. *Nature* **510**, 417-421, doi:10.1038/nature13421 (2014).
- 567 6 Smith, M. I. *et al.* Gut microbiomes of Malawian twin pairs discordant for kwashiorkor. *Science*  
568 **339**, 548-554, doi:10.1126/science.1229000 (2013).
- 569 7 Desai, N. T., Sarkar, R. & Kang, G. Cryptosporidiosis: An under-recognized public health problem.  
570 *Trop Parasitol* **2**, 91-98, doi:10.4103/2229-5070.105173 (2012).
- 571 8 Mondal, D. *et al.* Contribution of enteric infection, altered intestinal barrier function, and  
572 maternal malnutrition to infant malnutrition in Bangladesh. *Clin Infect Dis* **54**, 185-192,  
573 doi:10.1093/cid/cir807 (2012).
- 574 9 Ramanan, D. *et al.* Helminth infection promotes colonization resistance via type 2 immunity.  
575 *Science* **352**, 608-612, doi:10.1126/science.aaf3229 (2016).
- 576 10 Chappell, C. L. *et al.* Fecal Indole as a Biomarker of Susceptibility to Cryptosporidium Infection.  
577 *Infect Immun* **84**, 2299-2306, doi:10.1128/IAI.00336-16 (2016).
- 578 11 Chudnovskiy, A. *et al.* Host-Protozoan Interactions Protect from Mucosal Infections through  
579 Activation of the Inflammasome. *Cell* **167**, 444-456 e414, doi:10.1016/j.cell.2016.08.076 (2016).
- 580 12 Reynolds, L. A. *et al.* Commensal-pathogen interactions in the intestinal tract: lactobacilli  
581 promote infection with, and are promoted by, helminth parasites. *Gut Microbes* **5**, 522-532,  
582 doi:10.4161/gmic.32155 (2014).
- 583 13 Popovic, A. *et al.* Design and application of a novel two-amplicon approach for defining  
584 eukaryotic microbiota. *Microbiome* **6**, 228, doi:10.1186/s40168-018-0612-3 (2018).
- 585 14 Tam, E., Keats, E. C., Rind, F., Das, J. K. & Bhutta, A. Z. A. Micronutrient Supplementation and  
586 Fortification Interventions on Health and Development Outcomes among Children Under-Five in  
587 Low- and Middle-Income Countries: A Systematic Review and Meta-Analysis. *Nutrients* **12**,  
588 doi:10.3390/nu12020289 (2020).
- 589 15 Keats, E. C. *et al.* Effective interventions to address maternal and child malnutrition: an update  
590 of the evidence. *Lancet Child Adolesc Health* **5**, 367-384, doi:10.1016/S2352-4642(20)30274-1  
591 (2021).
- 592 16 (UNICEF), U. N. C. s. F. Nutrition, for Every Child: UNICEF Nutrition Strategy 2020–2030.,  
593 (UNICEF, New York, 2020).
- 594 17 Mayo-Wilson, E. *et al.* Zinc supplementation for preventing mortality, morbidity, and growth  
595 failure in children aged 6 months to 12 years of age. *Cochrane Database Syst Rev*, CD009384,  
596 doi:10.1002/14651858.CD009384.pub2 (2014).
- 597 18 Imdad, A., Mayo-Wilson, E., Herzer, K. & Bhutta, Z. A. Vitamin A supplementation for preventing  
598 morbidity and mortality in children from six months to five years of age. *Cochrane Database Syst*  
599 *Rev* **3**, CD008524, doi:10.1002/14651858.CD008524.pub3 (2017).
- 600 19 Papier, K. *et al.* Childhood malnutrition and parasitic helminth interactions. *Clin Infect Dis* **59**,  
601 234-243, doi:10.1093/cid/ciu211 (2014).

- 602 20 Hibberd, M. C. *et al.* The effects of micronutrient deficiencies on bacterial species from the  
603 human gut microbiota. *Sci Transl Med* **9**, doi:10.1126/scitranslmed.aal4069 (2017).
- 604 21 Becker, K. W. & Skaar, E. P. Metal limitation and toxicity at the interface between host and  
605 pathogen. *FEMS Microbiol Rev* **38**, 1235-1249, doi:10.1111/1574-6976.12087  
606 10.1111/1574-6976.12087. Epub 2014 Sep 29. (2014).
- 607 22 Jaeggi, T. *et al.* Iron fortification adversely affects the gut microbiome, increases pathogen  
608 abundance and induces intestinal inflammation in Kenyan infants. *Gut* **64**, 731-742,  
609 doi:10.1136/gutjnl-2014-307720 (2015).
- 610 23 Paganini, D. *et al.* Iron-containing micronutrient powders modify the effect of oral antibiotics on  
611 the infant gut microbiome and increase post-antibiotic diarrhoea risk: a controlled study in  
612 Kenya. *Gut* **68**, 645-653, doi:10.1136/gutjnl-2018-317399 (2019).
- 613 24 Long, K. Z. *et al.* Effect of vitamin A and zinc supplementation on gastrointestinal parasitic  
614 infections among Mexican children. *Pediatrics* **120**, e846-855, doi:10.1542/peds.2006-2187  
615 (2007).
- 616 25 Richard, S. A. *et al.* Zinc and iron supplementation and malaria, diarrhea, and respiratory  
617 infections in children in the Peruvian Amazon. *Am J Trop Med Hyg* **75**, 126-132,  
618 doi:10.4269/ajtmh.2006.75.1.0750126 (2006).
- 619 26 Soofi, S. *et al.* Effect of provision of daily zinc and iron with several micronutrients on growth  
620 and morbidity among young children in Pakistan: a cluster-randomised trial. *The Lancet* **382**, 29-  
621 40, doi:10.1016/S0140-6736(13)60437-7 (2013).
- 622 27 Mendez-Salazar, E. O., Ortiz-Lopez, M. G., Granados-Silvestre, M. L. A., Palacios-Gonzalez, B. &  
623 Menjivar, M. Altered Gut Microbiota and Compositional Changes in Firmicutes and  
624 Proteobacteria in Mexican Undernourished and Obese Children. *Front Microbiol* **9**, 2494,  
625 doi:10.3389/fmicb.2018.02494 (2018).
- 626 28 Ridaura, V. K. *et al.* Gut microbiota from twins discordant for obesity modulate metabolism in  
627 mice. *Science* **341**, 1241214, doi:10.1126/science.1241214 (2013).
- 628 29 Ryan, E. T., Hill, D. R., Solomon, T., Endy, T. P. & Aronson, N. Hunter's tropical medicine and  
629 emerging infectious diseases. (2020).
- 630 30 Soares Magalhaes, R. J. *et al.* Extending helminth control beyond STH and schistosomiasis: the  
631 case of human hymenolepiasis. *PLoS Negl Trop Dis* **7**, e2321, doi:10.1371/journal.pntd.0002321  
632 (2013).
- 633 31 Daniels, M. E., Smith, W. A. & Jenkins, M. W. Estimating Cryptosporidium and Giardia disease  
634 burdens for children drinking untreated groundwater in a rural population in India. *PLoS Negl*  
635 *Trop Dis* **12**, e0006231, doi:10.1371/journal.pntd.0006231 (2018).
- 636 32 Kotloff, K. L. *et al.* Burden and aetiology of diarrhoeal disease in infants and young children in  
637 developing countries (the Global Enteric Multicenter Study, GEMS): a prospective, case-control  
638 study. *Lancet* **382**, 209-222, doi:10.1016/S0140-6736(13)60844-2 (2013).
- 639 33 Ajampur, S. S. *et al.* Symptomatic and asymptomatic Cryptosporidium infections in children in a  
640 semi-urban slum community in southern India. *Am J Trop Med Hyg* **83**, 1110-1115,  
641 doi:10.4269/ajtmh.2010.09-0644 (2010).
- 642 34 Platts-Mills, J. A. *et al.* Use of quantitative molecular diagnostic methods to assess the aetiology,  
643 burden, and clinical characteristics of diarrhoea in children in low-resource settings: a reanalysis  
644 of the MAL-ED cohort study. *Lancet Glob Health* **6**, e1309-e1318, doi:10.1016/S2214-  
645 109X(18)30349-8 (2018).
- 646 35 Kosek, M. N. & Investigators, M.-E. N. Causal Pathways from Enteropathogens to Environmental  
647 Enteropathy: Findings from the MAL-ED Birth Cohort Study. *EBioMedicine* **18**, 109-117,  
648 doi:10.1016/j.ebiom.2017.02.024 (2017).

- 649 36 Francis, J. R., Villanueva, P., Bryant, P. & Blyth, C. C. Mucormycosis in Children: Review and  
650 Recommendations for Management. *J Pediatric Infect Dis Soc* **7**, 159-164,  
651 doi:10.1093/jpids/pix107 (2018).
- 652 37 Prakash, H. & Chakrabarti, A. Global Epidemiology of Mucormycosis. *J Fungi (Basel)* **5**,  
653 doi:10.3390/jof5010026 (2019).
- 654 38 Raut, A. & Huy, N. T. Rising incidence of mucormycosis in patients with COVID-19: another  
655 challenge for India amidst the second wave? *Lancet Respir Med*, doi:10.1016/S2213-  
656 2600(21)00265-4 (2021).
- 657 39 Sazawal, S. *et al.* Effects of routine prophylactic supplementation with iron and folic acid on  
658 admission to hospital and mortality in preschool children in a high malaria transmission setting:  
659 community-based, randomised, placebo-controlled trial. *Lancet* **367**, 133-143,  
660 doi:10.1016/S0140-6736(06)67962-2 (2006).
- 661 40 Symeonidis, A. S. The role of iron and iron chelators in zygomycosis. *Clin Microbiol Infect* **15**  
662 **Suppl 5**, 26-32, doi:10.1111/j.1469-0691.2009.02976.x (2009).
- 663 41 Ibrahim, A. S., Spellberg, B., Walsh, T. J. & Kontoyiannis, D. P. Pathogenesis of mucormycosis.  
664 *Clin Infect Dis* **54 Suppl 1**, S16-22, doi:10.1093/cid/cir865 (2012).
- 665 42 Gwamaka, M. *et al.* Iron deficiency protects against severe Plasmodium falciparum malaria and  
666 death in young children. *Clin Infect Dis* **54**, 1137-1144, doi:10.1093/cid/cis010 (2012).
- 667 43 Jonker, F. A. *et al.* Iron status predicts malaria risk in Malawian preschool children. *PLoS One* **7**,  
668 e42670, doi:10.1371/journal.pone.0042670 (2012).
- 669 44 Shankar, A. H. & Prasad, A. S. Zinc and immune function: the biological basis of altered  
670 resistance to infection. *Am J Clin Nutr* **68**, 447S-463S, doi:10.1093/ajcn/68.2.447S (1998).
- 671 45 Veenemans, J. *et al.* Protection against diarrhea associated with Giardia intestinalis is lost with  
672 multi-nutrient supplementation: a study in Tanzanian children. *PLoS Negl Trop Dis* **5**, e1158,  
673 doi:10.1371/journal.pntd.0001158 (2011).
- 674 46 Paganini, D. & Zimmermann, M. B. The effects of iron fortification and supplementation on the  
675 gut microbiome and diarrhea in infants and children: a review. *Am J Clin Nutr* **106**, 1688S-1693S,  
676 doi:10.3945/ajcn.117.156067 (2017).
- 677 47 Bartelt, L. A. *et al.* Cross-modulation of pathogen-specific pathways enhances malnutrition  
678 during enteric co-infection with Giardia lamblia and enteroaggregative Escherichia coli. *PLoS*  
679 *Pathog* **13**, e1006471, doi:10.1371/journal.ppat.1006471 (2017).
- 680 48 Sokol, H. *et al.* Fungal microbiota dysbiosis in IBD. *Gut* **66**, 1039-1048, doi:10.1136/gutjnl-2015-  
681 310746 (2017).
- 682 49 Mar Rodriguez, M. *et al.* Obesity changes the human gut mycobiome. *Sci Rep* **5**, 14600,  
683 doi:10.1038/srep14600 (2015).
- 684 50 Caporaso, J. G. *et al.* Global patterns of 16S rRNA diversity at a depth of millions of sequences  
685 per sample. *Proc Natl Acad Sci U S A* **108 Suppl 1**, 4516-4522, doi:10.1073/pnas.1000080107  
686 (2011).
- 687 51 Rognes, T., Flouri, T., Nichols, B., Quince, C. & Mahe, F. VSEARCH: a versatile open source tool  
688 for metagenomics. *PeerJ* **4**, e2584, doi:10.7717/peerj.2584 (2016).
- 689 52 Edgar, R. C. Search and clustering orders of magnitude faster than BLAST. *Bioinformatics* **26**,  
690 2460-2461, doi:10.1093/bioinformatics/btq461 (2010).
- 691 53 Edgar, R. C. UNOISE2: improved error-correction for Illumina 16S and ITS amplicon sequencing.  
692 *bioRxiv* (2016).
- 693 54 Edgar, R. C. SINTAX: a simple non-Bayesian taxonomy classifier for 16S and ITS sequences.  
694 *bioRxiv* (2016).
- 695 55 Cole, J. R. *et al.* Ribosomal Database Project: data and tools for high throughput rRNA analysis.  
696 *Nucleic Acids Res* **42**, D633-642, doi:10.1093/nar/gkt1244 (2014).

- 697 56 Bolger, A. M., Lohse, M. & Usadel, B. Trimmomatic: a flexible trimmer for Illumina sequence  
698 data. *Bioinformatics* **30**, 2114-2120, doi:10.1093/bioinformatics/btu170 (2014).
- 699 57 Pruesse, E., Peplies, J. & Glockner, F. O. SINA: accurate high-throughput multiple sequence  
700 alignment of ribosomal RNA genes. *Bioinformatics* **28**, 1823-1829,  
701 doi:10.1093/bioinformatics/bts252 (2012).
- 702 58 Quast, C. *et al.* The SILVA ribosomal RNA gene database project: improved data processing and  
703 web-based tools. *Nucleic Acids Res* **41**, D590-596, doi:10.1093/nar/gks1219 (2013).
- 704 59 Coordinators, N. R. Database Resources of the National Center for Biotechnology Information.  
705 *Nucleic Acids Res* **45**, D12-D17, doi:10.1093/nar/gkw1071 (2017).
- 706 60 Altschul, S. F., Gish, W., Miller, W., Myers, E. W. & Lipman, D. J. Basic local alignment search  
707 tool. *J Mol Biol* **215**, 403-410, doi:10.1016/S0022-2836(05)80360-2 (1990).
- 708 61 Price, M. N., Dehal, P. S. & Arkin, A. P. FastTree: computing large minimum evolution trees with  
709 profiles instead of a distance matrix. *Mol Biol Evol* **26**, 1641-1650, doi:10.1093/molbev/msp077  
710 (2009).
- 711 62 Moore, R. M., Harrison, A. O., McAllister, S. M., Polson, S. W. & Wommack, K. E. Iroki: automatic  
712 customization and visualization of phylogenetic trees. *PeerJ* **8**, e8584, doi:10.7717/peerj.8584  
713 (2020).
- 714 63 McMurdie, P. J. & Holmes, S. phyloseq: an R package for reproducible interactive analysis and  
715 graphics of microbiome census data. *PLoS One* **8**, e61217, doi:10.1371/journal.pone.0061217  
716 (2013).
- 717 64 Venables, W. N., Ripley, B. D. & Venables, W. N. *Modern applied statistics with S*. 4th edn,  
718 (Springer, 2002).
- 719 65 Oksanen, J. B., F. Guillaume; Friendly, Michael; Kindt, Roeland; Legendre, Pierre; McGlinn, Dan;  
720 Minchin, Peter R. ; O'Hara, R. B.; Simpson, Gavin L.; Solymos, Peter; Henry M.; Stevens, H.;  
721 Szoecs, Eduard; Wagner, Helene. *vegan: Community Ecology Package*, <[https://CRAN.R-](https://CRAN.R-project.org/package=vegan)  
722 [project.org/package=vegan](https://CRAN.R-project.org/package=vegan)> (2017).
- 723 66 Love, M. I., Huber, W. & Anders, S. Moderated estimation of fold change and dispersion for  
724 RNA-seq data with DESeq2. *Genome Biol* **15**, 550, doi:10.1186/s13059-014-0550-8 (2014).
- 725 67 Kurtz, Z. D. *et al.* Sparse and compositionally robust inference of microbial ecological networks.  
726 *PLoS Comput Biol* **11**, e1004226, doi:10.1371/journal.pcbi.1004226 (2015).
- 727 68 Csardi, G. & Nepusz, T. The igraph software package for complex network research. *InterJournal,*  
728 *Complex Systems* **1695** (2006).
- 729 69 Sanchez, G. (Berkeley, 2013).
- 730 70 Team, R. C. R: *A language and environment for statistical computing.*, <[https://www.R-](https://www.R-project.org/)  
731 [project.org/](https://www.R-project.org/)> (2020).
- 732

733 **Acknowledgements**

734 We thank Imran Ahmed (Aga Khan University, Karachi, Pakistan) and Didar Alam (Aga Khan  
735 University) for assistance with organizing stool sample shipments from Pakistan to Canada and  
736 providing secure access to clinical data. We also appreciate the helpful advice and insights from  
737 Amel Taibi and Elena Comelli in addressing challenges encountered during extraction of sample  
738 DNA.

739

740 **Author contributions**

741 L.G.P., Z.A.B., J.P. and R.H.J.B. conceived and designed the study. S.S. and Z.A.B. participated  
742 in original collection of clinical samples. A.P. isolated DNA and processed the sequencing data.  
743 P.W.W and D.S.G. aided in design of amplicon generation. A.P. and C.B. analyzed the data and  
744 wrote the paper and all authors reviewed and/or edited the paper.

745

746 **Competing interests**

747 The authors declare no competing interests.

748

749 **Tables**

750

751 **Table 1.** Participant characteristics. Categorical values are presented as n (%), continuous  
 752 variables show the mean and 95% confidence intervals. Premature birth was defined as  
 753 gestational age < 37 months. Initiation of breastfeeding was reported for the period prior to  
 754 recruitment into the study.

755

|                                | <b>Undernourished</b><br>(n=31) | <b>Reference WLZ</b><br>(n=49) | <b>Total</b><br>(n=80) |
|--------------------------------|---------------------------------|--------------------------------|------------------------|
| <b>Rural site, n(%)</b>        | 25 (80.6%)                      | 28 (57.1%)                     | 53 (66.2%)             |
| <b>Treatment arm, n(%)</b>     |                                 |                                |                        |
| Control                        | 10 (32.3%)                      | 14 (28.6%)                     | 24 (30.0%)             |
| MNP                            | 14 (45.2%)                      | 15 (30.6%)                     | 29 (36.2%)             |
| MNP with zinc                  | 7 (22.6%)                       | 20 (40.8%)                     | 27 (33.8%)             |
| Female, n(%)                   | 14 (45.2%)                      | 30 (61.2%)                     | 44 (55.0%)             |
| Premature birth, n(%)          | 6 (19.4%)                       | 10 (20.4%)                     | 16 (20.0%)             |
| Initiated breastfeeding, n (%) | 31 (100.0%)                     | 47 (95.9%)                     | 78 (97.5%)             |
| <b>Anthropometry, 12 mo</b>    |                                 |                                |                        |
| Weight, Kg                     | 6.6 (6.3, 7.0)                  | 8.5 (8.2, 8.8)                 | 7.8 (7.5, 8.1)         |
| Length, cm                     | 69.2 (67.7, 70.7)               | 71.2 (70.4, 72.1)              | 70.6 (69.9, 71.4)      |
| Weight-for-length, z-score     | -2.4 (-3.1, -1.7)               | -0.0 (-0.3, 0.2)               | -0.7 (-1.1, -0.4)      |
| <b>Anthropometry, 24 mo</b>    |                                 |                                |                        |
| Weight, Kg                     | 8.0 (7.6, 8.3)                  | 10.5 (10.2, 10.9)              | 9.5 (9.2, 9.9)         |
| Length, cm                     | 78.9 (77.3, 80.4)               | 80.5 (79.5, 81.4)              | 79.8 (79.0, 80.7)      |
| Weight-for-length, z-score     | -2.9 (-3.2, -2.7)               | 0.2 (-0.1, 0.4)                | -1.0 (-1.4, -0.7)      |

756



757 **Figures and figure legends**

758

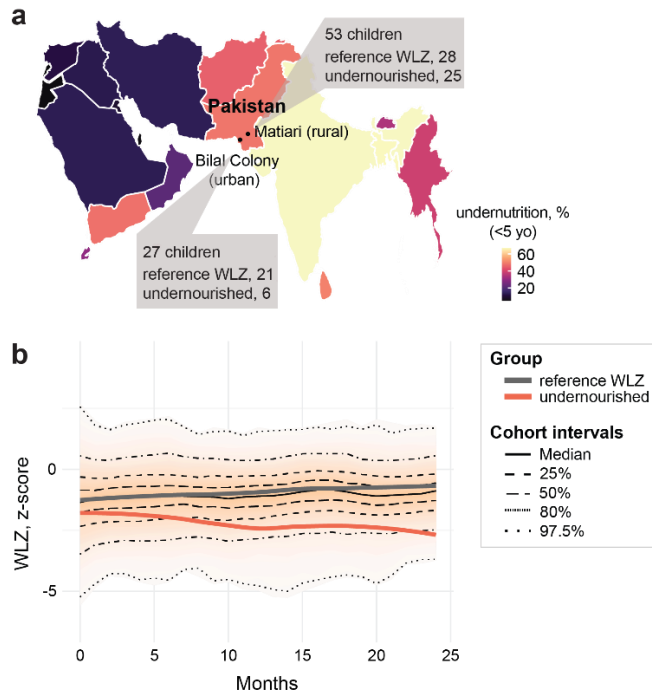

759

760 **Fig. 1.** Participant characteristics. (a) Level of childhood undernutrition in Pakistan and the  
761 surrounding regions. Latest country data was retrieved from [www.who.int/data/gho/indicator-](http://www.who.int/data/gho/indicator-metadata-registry/imr-details/27)  
762 [metadata-registry/imr-details/27](http://www.who.int/data/gho/indicator-metadata-registry/imr-details/27) on Feb 1, 2021. Urban and rural places of residence of the  
763 participants are indicated. (b) Weight-for-length z-scores of children recruited into clinical trial  
764 NCT00705445 during the first 24 months of life. Median and quantile values are shown, with  
765 medians for participants profiled in current study indicated by red (undernourished) and black  
766 (reference WLZ) lines.

767



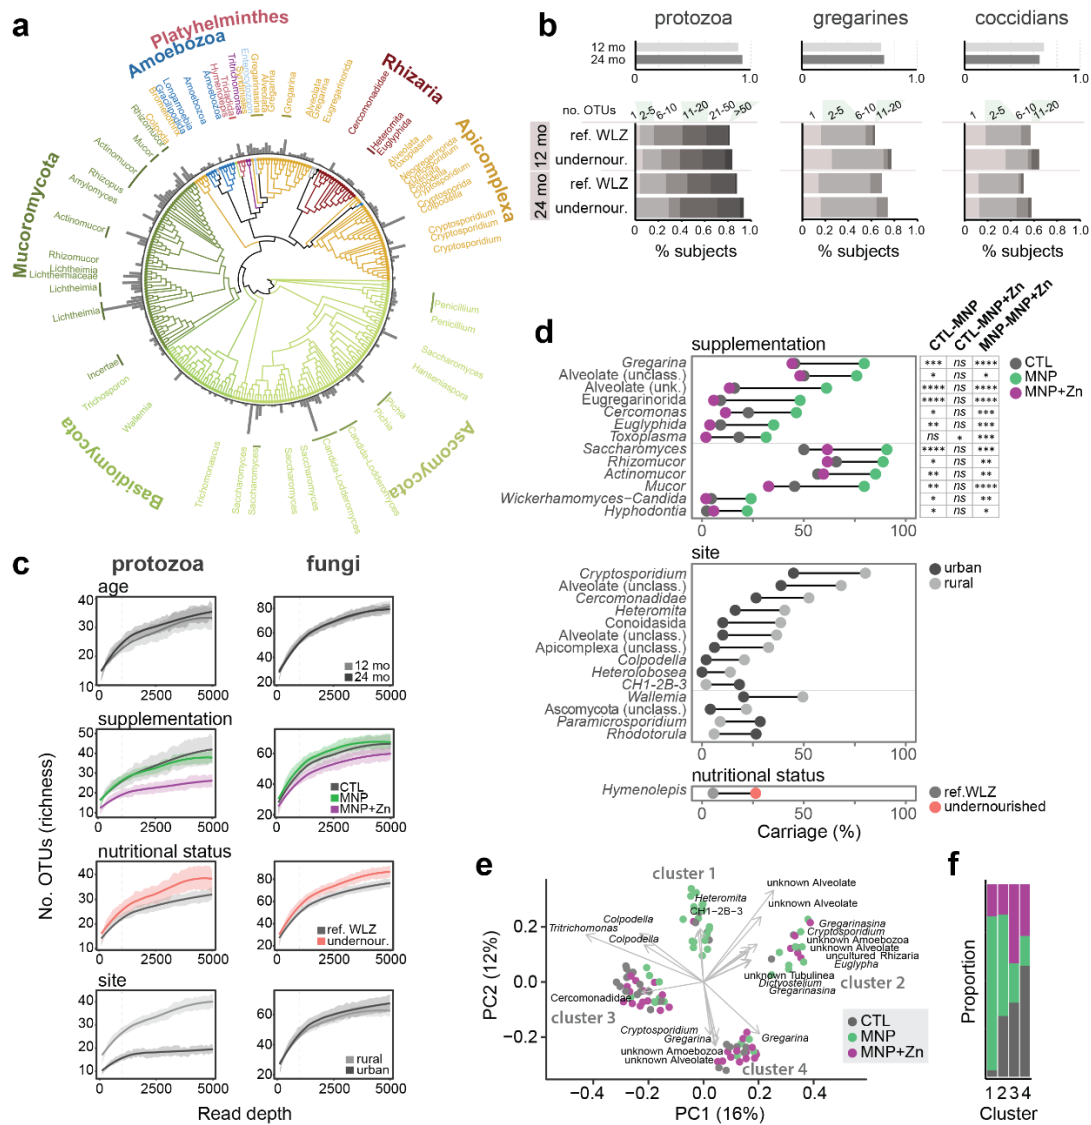

768

769 **Fig. 2.** Eukaryotic communities in the gut are diverse and impacted by micronutrient

770 supplementation and place of residence. (a) Phylogenetic tree representing eukaryotic taxa

771 detected in children. Branches are coloured by phylum and bars represent the prevalences of OTUs

772 in the cohort. Named organisms represent those detected in more than 5% of samples with a

773 minimum of 100 reads. (b) Prevalences of protozoan (left), and specifically gregarine (middle) or

774 coccidian (right) OTUs detected in children at 12 and 24 months of age. Prevalences are subdivided

775 by nutritional group in bottom graphs, where shaded regions denote binned numbers of OTUs

776 identified per sample. (c) Rarefaction curves comparing the mean protozoan and fungal species

777 richness by age group, micronutrient supplementation, nutritional status and place of residence  
778 (site). Shaded regions represent standard error. Dashed lines denote the read depth at which  
779 significance was tested. (d) Carriage of eukaryotic taxa significantly associated with micronutrient  
780 supplementation, place of residence (site) or nutritional status. Results from Fisher's pairwise tests  
781 among supplementation groups are indicated to the right. \* $p < 0.05$ , \*\* $p < 0.01$ , \*\*\* $p < 0.001$ . (e)  
782 Principal coordinate analysis of sample dissimilarities (n=106) based on protozoan composition,  
783 calculated using unweighted Unifrac scores. Samples are coloured by supplementation arm, and  
784 arrows indicate the direction of cosines of taxa significantly correlated with the first two principal  
785 components. Arrow lengths are scaled by the root square ( $r^2$ ) of the correlation. Identified clusters  
786 are numbered 1 though 4. (f) Proportions of samples from the respective supplementation arms  
787 within each protozoan community cluster.

788

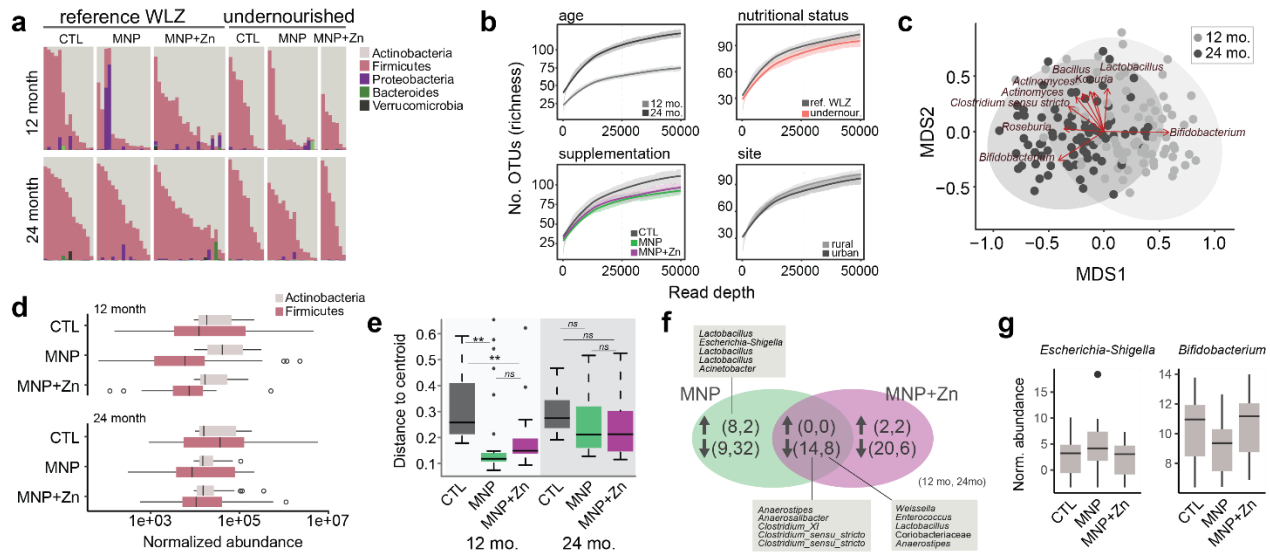

789

790 **Fig. 3.** Bacterial microbiota change with age and supplementation. (a) Relative abundances of  
 791 bacterial phyla in 12 (top) and 24 (bottom) month old children based on 16S data. Samples are  
 792 sorted by the proportion of Firmicutes along the horizontal axis. (b) Rarefaction curves comparing  
 793 mean species richness by age group, micronutrient supplementation, nutritional status and place  
 794 of residence (study site). Shaded regions represent standard errors and the dotted lines denote the  
 795 read depth at which significance was tested. (c) Non-metric multidimensional scaling of bacterial  
 796 compositions in samples based on Bray-Curtis dissimilarities. Samples are coloured by age and  
 797 ellipses represent 95% confidence intervals. Arrows indicate the direction of cosines of the top 10  
 798 bacterial OTUs significantly correlated with the ordination axes, and are scaled by their strength  
 799 of correlation ( $r^2$ ). (d) Mean DESeq2-transformed abundance of Actinobacteria and Firmicutes  
 800 grouped by nutritional status and treatment. (e) Compositional variance among samples grouped  
 801 by supplementation arm and age measured as distances to centroid, based on NMDS of weighted  
 802 Unifrac dissimilarity scores. \* $p < 0.05$ , \*\* $p < 0.01$ , \*\*\* $p < 0.001$  (f) Venn diagram showing the  
 803 numbers of bacterial taxa with significantly increased or decreased abundance, as indicated by  
 804 arrows, in supplemented groups relative to the control group. The pairs of numbers within brackets  
 805 refer to taxa at 12 and 24 months of age respectively, and select taxa are listed in boxes. (g)

806 Normalized abundance of *Escherichia-Shigella* and *Bifidobacterium* OTUs across  
807 supplementation arms at 12 months.

808

809

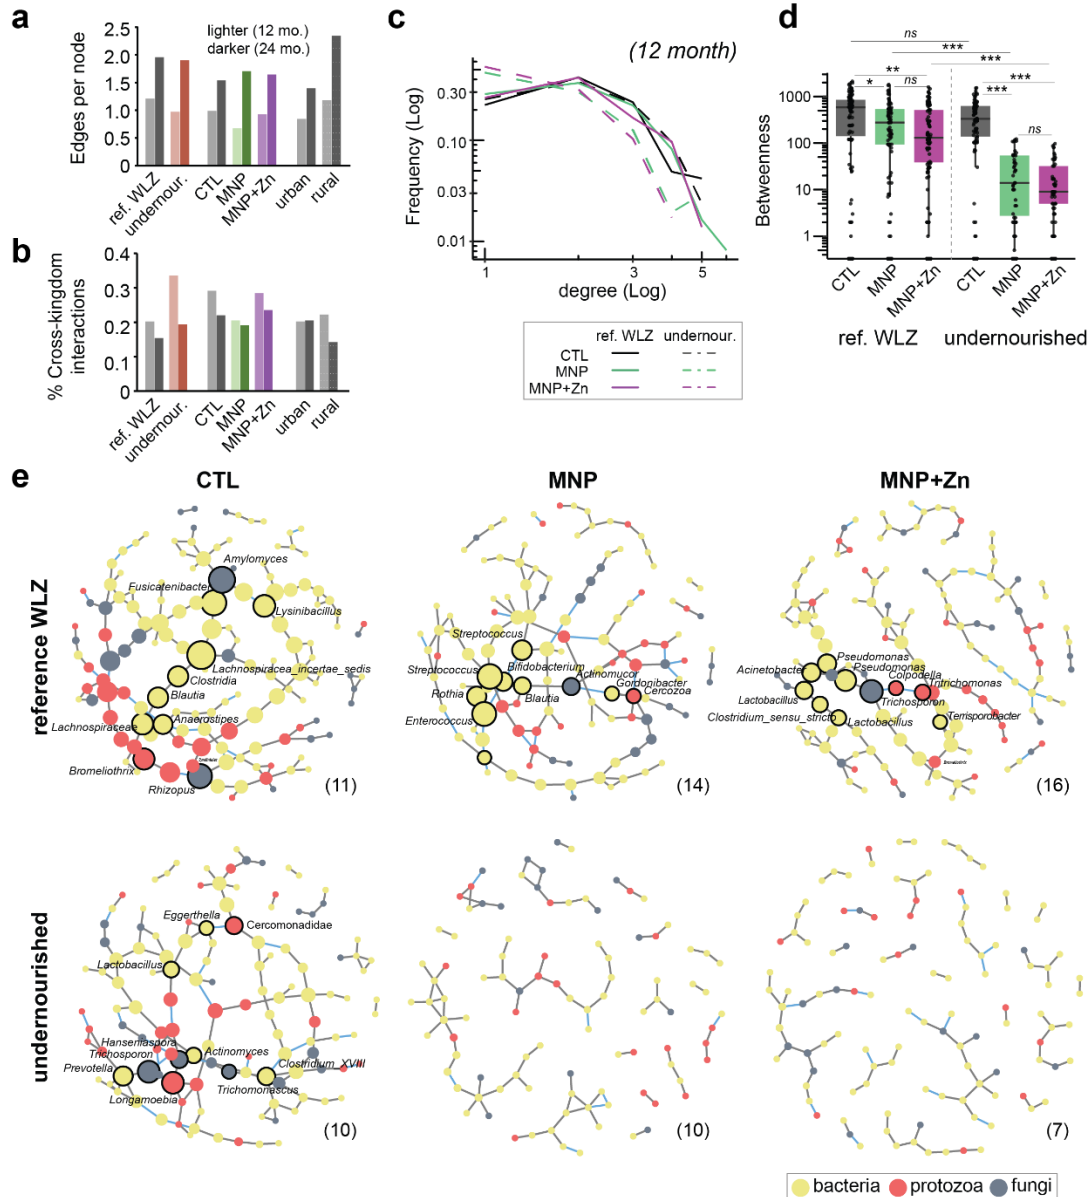

810

811 **Fig. 4.** Supplementation influences microbial interactions. (a) Density of microbial interactions,

812 calculated as significant correlations among microbiota (edges) normalized by the numbers of taxa

813 (nodes), by nutritional status, supplementation arm and place of residence (site). Lighter and darker

814 hues represent 12 and 24 month old samples respectively. (b) Proportions of significant microbial

815 interactions occurring cross-kingdom, within indicated sample groups. (c) Degree distribution and

816 (d) betweenness centrality scores of microbial networks in 12 month old children grouped by

817 nutritional status and supplementation arm. (e) Graphic representations of aforementioned

818 networks representing predicted microbial interactions in 12 month old children, grouped by  
819 nutritional status and micronutrient treatment. Nodes represent bacterial OTUs (yellow) and  
820 protozoan and fungal genera (red and grey, respectively), scaled by betweenness centrality scores.  
821 Edges represent significant positive (grey) and negative (blue) correlations among microbiota.  
822 Taxa with no predicted interactions have been removed. Numbers of samples used to generate  
823 each network are indicated within brackets.

824

825

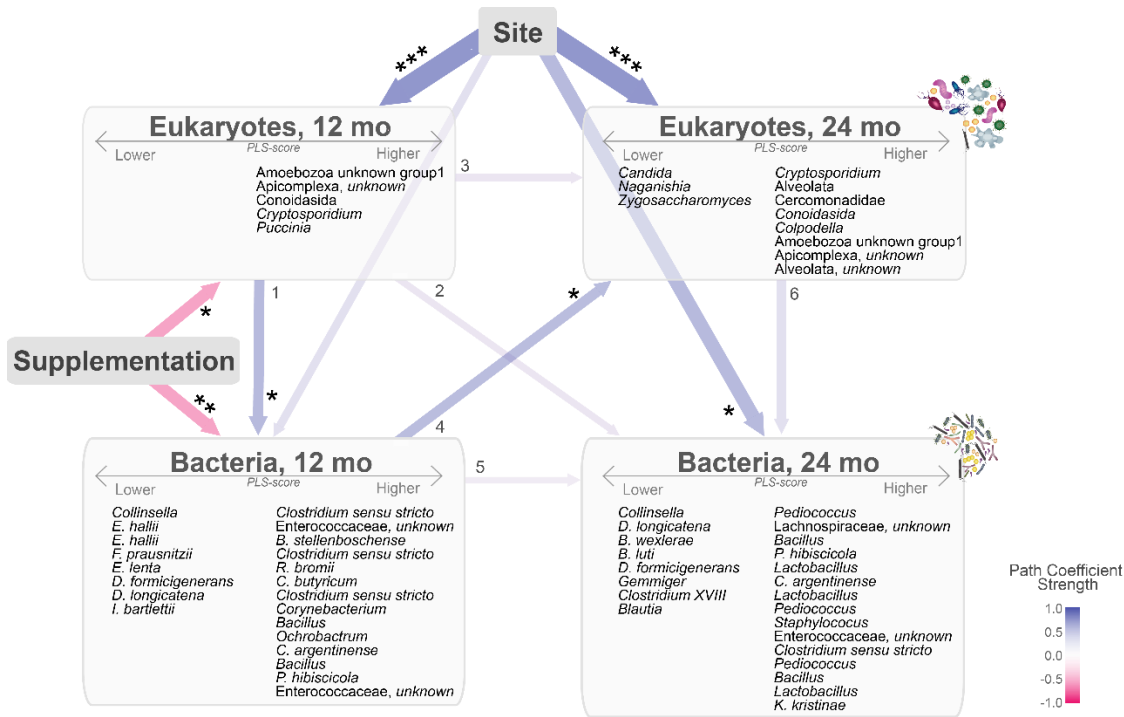

826

827 **Fig. 5.** Graphic representation of the cross-associations among demographic variables,  
 828 micronutrient supplementation and microbiota over time. Interconnected arrows indicate the tested  
 829 cross-correlated paths between nodes of: place of residence (site), supplementation, and the  
 830 composite measures of bacterial and eukaryotic OTUs detected at 12 and 24 months, collapsed as  
 831 latent PLS-scores. Negative correlations are indicated in pink and positive in blue. Arrow thickness  
 832 is weighted by the effect size of the direct path coefficients as indicated in Supplementary Table  
 833 5. Significance of direct paths, \* $p < 0.05$ , \*\* $p < 0.01$ , \*\*\* $p < 0.0001$ . OTUs that loaded positively  
 834 ( $>0.4$ ) or negatively ( $<-0.4$ ) within each PLS-score are listed within boxes. PLS, partial least  
 835 square; OTUs, operational taxonomic units.

836

837
